# Supplementary material for: Assessment of Golden Proportion among Natural Maxillary Anterior Teeth of Global Population: A Systematic Review
Source: MDPI journal article supplement (doi:10.3390/app12126196), 2022-06-17
Supplement: s1 [file s1]

Archive with 1 entries (1 files):
- applsci-1747528-supplementary.pdf
